# Supplementary material for: Maleness-on-the-Y (MoY) orchestrates male sex determination in major agricultural fruit fly pests
Source: bioRxiv or medRxiv preprint supplement (doi:10.1101/533646), 2019-02-07
Supplement: Supplementary file [file media-3.pdf]

| N* | DE+CQ transcripts 4-8h    | Medfly | Baylor Genome                         | Presence in Fam18 Canu | male-specific in 4-8 h Ben embryos | CQ transcripts 0-48h+males | Blastx Ceratitis                                   | Blastx Drosophila                                | male specific in B. oleae embryos | mapdXY.CQ | mapdXX.CQ | CQ |
|----|---------------------------|--------|---------------------------------------|------------------------|------------------------------------|----------------------------|----------------------------------------------------|--------------------------------------------------|-----------------------------------|-----------|-----------|----|
| 1a | TRINITY_DN40516_c0_g1_i6  | No     | (shorter highly related sequences)    | multiple               | Yes                                |                            | no similarity                                      | no similarity                                    | no similarity                     | 11118     | 0         | 0  |
| 1b | TRINITY_DN40516_c0_g2_i3  | No     | (shorter highly related sequences)    | multiple               | Yes                                | Lyra                       | putative gustatory receptor 59f                    | none                                             | no similarity                     | 10916     | 0         | 0  |
|    |                           |        |                                       |                        |                                    |                            | XP_004526066.1 (E value 2.9)                       |                                                  |                                   |           |           |    |
| 1c | TRINITY_DN40516_c0_g2_i2  | No     | (shorter highly related sequences)    | multiple               | Yes                                | Lyra                       | putative gustatory receptor 59f                    | zpg                                              | no similarity                     | 10794     | 0         | 0  |
|    |                           |        |                                       |                        |                                    |                            | XP_004526066.1 (E value 1.7)                       |                                                  |                                   |           |           |    |
| 1d | TRINITY_DN40516_c0_g1_i2  | No     | (shorter highly related sequences)    | multiple               | Yes                                | Lyra                       | no similarity                                      | no similarity                                    | no similarity                     | 10759     | 0         | 0  |
| 1e | TRINITY_DN40516_c0_g2_i1  | No     | (shorter highly related sequences)    | multiple               | Yes                                |                            | putative gustatory receptor 59f                    | mabiki [Drosophila]                              | yes, short and weak               | 11935     | 0         | 0  |
|    |                           |        |                                       |                        |                                    |                            | XP_004526066.1 (E value 2.2)                       | melanogaster] (E value 7.5)                      |                                   |           |           |    |
| 2  | TRINITY_DN38563_c5_g1_i1  | No     | (shorter highly related sequences)    | none                   | Yes                                |                            | branchpoint-bridging protein (E value 6e-39)       | quaking related 58E-2, isoform A (E value 1e-30) | no similarity                     | 79        | 0         | 0  |
|    |                           |        |                                       |                        |                                    |                            |                                                    |                                                  |                                   |           |           |    |
| 3a | TRINITY_DN40292_c0_g1_i10 | No     | (shorter highly related sequences)    | multiple               | Yes                                |                            | no similarity                                      | no similarity                                    | no similarity                     | 5813      | 0         | 0  |
| 1f | TRINITY_DN40516_c0_g1_i5  | No     | (shorter highly related sequences)    | none                   | Yes                                |                            | no similarity                                      | no similarity                                    | no similarity                     | 10249     | 0         | 0  |
| 3b | TRINITY_DN40292_c0_g3_i1  | No     | No                                    | single                 | Yes                                | Corvus                     | none                                               | Lace isoform E (E value 1.7)                     | yes, short                        | 68        | 0         | 0  |
| 4a | TRINITY_DN40142_c1_g4_i1  | No     | (highly related paralogous sequences) | multiple               | Yes                                |                            | histone H2B (E value 6e-43)                        | histone H2B (E value 2e-42)                      | no-male specific                  | 872       | 0         | 0  |
|    |                           |        |                                       |                        |                                    |                            |                                                    |                                                  |                                   |           |           |    |
| 5  | TRINITY_DN33215_c0_g2_i1  | No     | (highly related paralogous sequences) | none                   | No                                 |                            | uncharacterized protein                            | none                                             | yes, short                        | 3982      | 0         | 0  |
|    |                           |        |                                       |                        |                                    |                            | LOC105665391 (E value 5.6)                         |                                                  |                                   |           |           |    |
| 1g | TRINITY_DN40516_c0_g1_i7  | No     | (shorter highly related sequences)    | multiple               | Yes                                |                            | no similarity                                      | no similarity                                    | no similarity                     | 8580      | 0         | 0  |
| 6  | TRINITY_DN40470_c17_g1_i5 | No     | (highly related paralogous sequences) | none                   | Yes                                |                            | cytosol aminopeptidase (E value 2e-23)             | Sperm-Leucylaminopeptidase 5 (E value 3e-13)     | yes                               | 3182      | 0         | 0  |
|    |                           |        |                                       |                        |                                    |                            |                                                    |                                                  |                                   |           |           |    |
| 4b | TRINITY_DN40142_c1_g1_i5  | No     | (highly related paralogous sequences) | multiple               | No                                 |                            | no similarity                                      | no similarity                                    | yes                               | 274       | 0         | 0  |
|    |                           |        |                                       |                        |                                    |                            |                                                    |                                                  |                                   |           |           |    |
| 4c | TRINITY_DN40142_c1_g4_i2  | No     | (shorter highly related sequences)    | multiple               | Yes                                |                            | histone H2B (E value 9e-30)                        | histone H2B (E value 1e-29)                      | no-male specific                  | 336       | 0         | 0  |
|    |                           |        |                                       |                        |                                    |                            |                                                    |                                                  |                                   |           |           |    |
| 7  | TRINITY_DN38104_c3_g2_i2  | Yes    | No                                    | none                   | No                                 |                            | no similarity                                      | no similarity                                    | no similarity                     | 6253      | 0         | 0  |
| 8  | TRINITY_DN40402_c3_g5_i1  | No     | (highly related paralogous sequences) | multiple               | Yes                                |                            | no similarity                                      | no similarity                                    | no similarity                     | 16013     | 0         | 0  |
|    |                           |        |                                       |                        |                                    |                            |                                                    |                                                  |                                   |           |           |    |
| 9  | TRINITY_DN36540_c0_g1_i1  | Yes    | No                                    | none                   | No                                 |                            | no similarity                                      | no similarity                                    | no similarity                     | 11903     | 0         | 0  |
| 10 | TRINITY_DN37671_c9_g1_i1  | Yes    | No                                    | none                   | Yes                                |                            | F-Box/SPRY domain-containing protein (E value 9.4) | no similarity                                    | no similarity                     | 11015     | 0         | 0  |
|    |                           |        |                                       |                        |                                    |                            |                                                    |                                                  |                                   |           |           |    |

**Extended Data Table 1 | List of 19 embryonic (4-8 h) transcripts corresponding to 10 putative Y-linked genes, filtered by DE and CQ analyses.** BLASTn analyses showed that most of the 19 transcripts are missing in the currently available medfly genome (NCBI), which however contain paralogous sequences. Only 3 transcripts have 100% corresponding genomic sequences in this assembly. In contrast, BLASTn analyses on the male medfly Canu *Fam18* genome showed that 12 transcripts have corresponding identical sequences, with most present in different contigs suggesting multiple copies. The presence of corresponding transcripts only in the mixed XX/XY but not in the XX-only transcriptome further supported male-specificity for 15 of them. 4 out of 19 transcripts corresponded to 2 previously selected putative Y-linked male-specific genes (*lyra* and *corvus*). BLASTx analysis on protein databases of *C. capitata* and *D. melanogaster* showed some similarity mostly to short stretch of peptidases, transcriptional factors, receptors and histone proteins. The number of *Fam18* male (mapdXY.CQ) and female (mapdXX.CQ) mapped reads and the chromosome quotient value (CQ), calculated as mapdXX.CQ/mapdXY.CQ, are reported.

| Injection Mix                  | Karyotypes of injected embryos                         | Injected embryos | Adults | XY males             | XX females | XY females          | XX males | XY intersexes | XX intersexes |
|--------------------------------|--------------------------------------------------------|------------------|--------|----------------------|------------|---------------------|----------|---------------|---------------|
| #1: dsRNA <i>MoY</i>           | XX/XY                                                  | 1217             | 96     | 16*                  | 59         | 14                  | 0        | 7             | 0             |
| #2: dsRNA <i>MoY</i>           | X X; <i>wp/wp</i><br>X Y- <i>wp*</i> ; <i>wp</i> , A-Y | 260              | 10     | 2* (XY- <i>wp*</i> ) | 7          | 1 (XY- <i>wp*</i> ) | 0        | 0             | 0             |
| #3: CRISPR/Cas9 vs <i>MoY</i>  | XX/XY                                                  | 250              | 32     | 7*                   | 18         | 2                   | 0        | 5             | 0             |
| #4: linear 5 Kb <i>MoY</i> DNA | XX/XY                                                  | 310              | 28     | 16                   | 3°         | 0                   | 3        | 0             | 6             |
| #5: <i>MoY</i> 5 Kb plasmid    | XX/XY                                                  | 190              | 16     | 8                    | 5°         | 0                   | 1        | 0             | 2             |
| #6: his-MOY protein            | XX                                                     | 428              | 31     | -                    | 25         | -                   | 0        | -             | 6             |
| #7: dsRNA <i>BoMoY</i>         | XX/XY                                                  | 550              | 24     | 6                    | 10         | 3                   | 0        | 5             | 0             |
| #8: dsRNA <i>BdMoY</i>         | XX/XY                                                  | 540              | 41     | 16                   | 17         | 4                   | 0        | 4             | 0             |

**Extended Data Table 2 | *MoY* is necessary (#1, #2 and #5) and sufficient (3#, 4# and 6#) for male sex determination and functionally conserved in *Bactrocera* species (#7-#8).** Medfly embryos injections at 0-1 h AEL of *MoY* dsRNA (#1-#2), DNA (#3, #4), Cas9 RNP (#5), and protein (#6). Embryos injections of *MoY* orthologues dsRNA in *Bactrocera oleae* and *B. dorsalis* (8#, 9#). In red are indicated numbers of flies showing partial or apparently full sexual transformations. In injection set 2#, a Y-marked brown pupae strain, carrying a white pupae recessive mutation on an autosome was used (reciprocal autosome-Y chromosome translocation). The male flies marked with \* in strongly female-biased progenies (#1, #2 and #5) were assigned to XY karyotype without molecular analyses, considering them as *MoY* RNAi or Cas9 escapers. Similarly, the female flies marked with ° in male-biased progenies (#3 and #4) were assigned to XX karyotype without molecular analyses. Injection set 1# reports data from 3 biological replicates reported in Extended Data Table 2 .

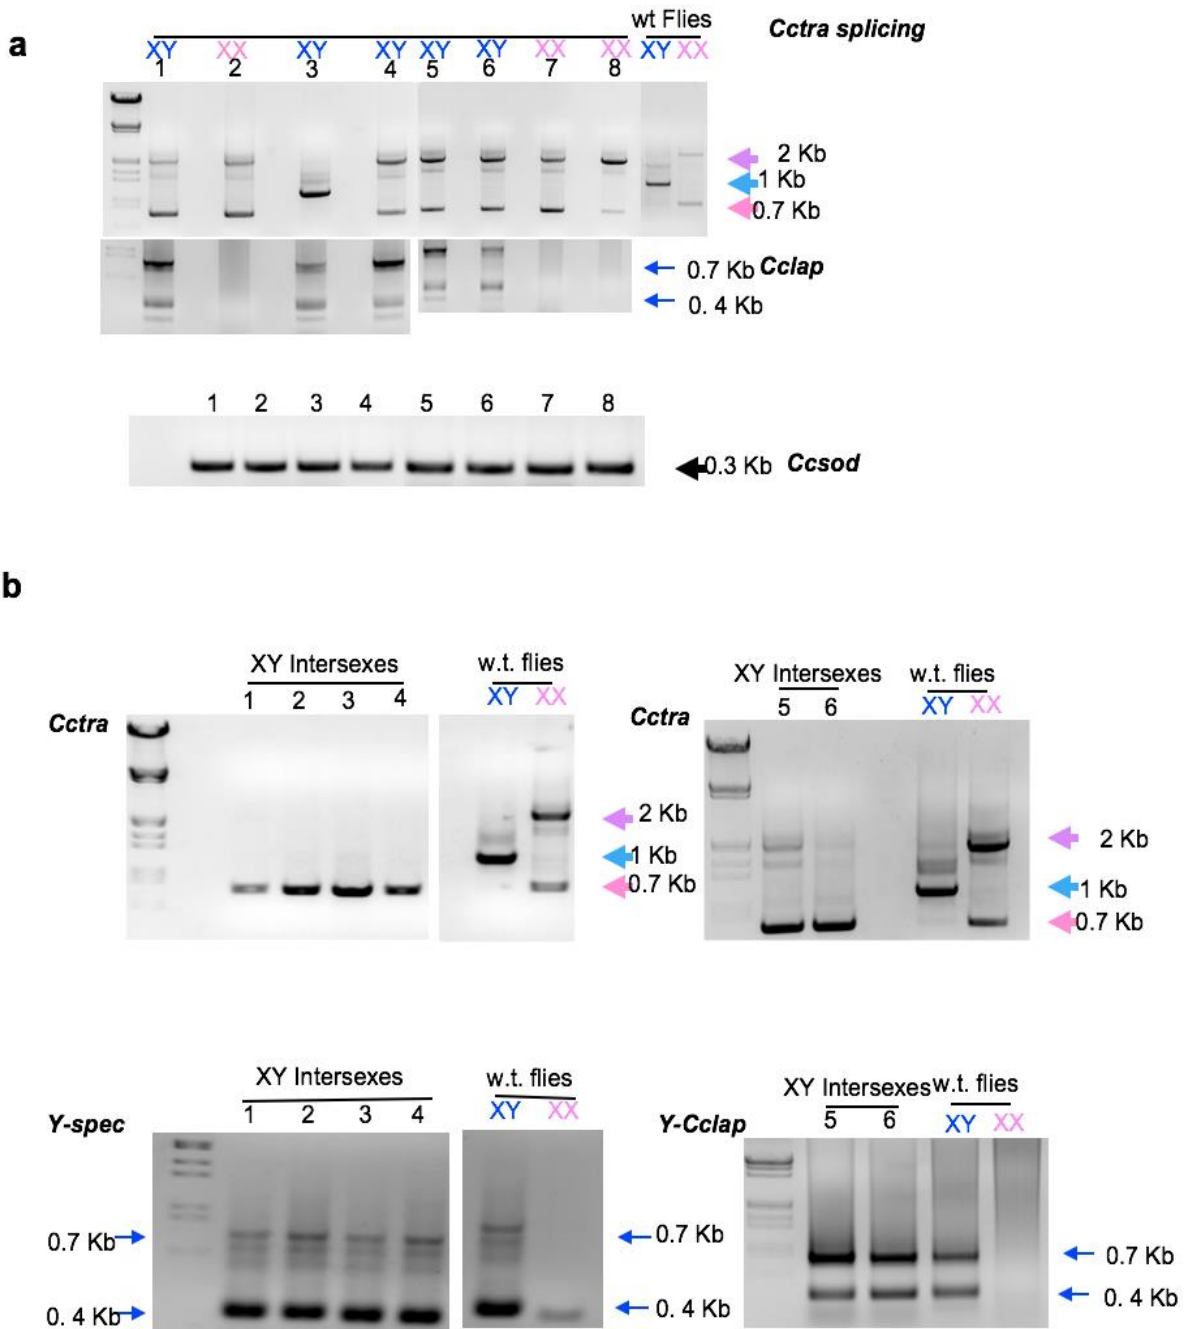

**Extended Data Fig. 1 | Transient embryonic silencing of *MoY* leads to *Cctra* female-specific splicing in XY larvae.** **a**, RT-PCR analyses of *Cctra* in 8 larvae hatched from *MoY* dsRNA-injected embryos showing *Cctra* female-specific transcripts (2 Kb and 0.7 Kb cDNA bands) in 4 out of 5 XY individuals (lanes 1, 4, 5 and 6). No effect was observed on female-specific *Cctra* splicing pattern in 3 XX larvae (lanes 2, 7 and 8) and on male-specific splicing pattern of 1 XY (lane 3) larvae. Sex-specific *Cctra* transcripts were amplified from adult flies as a reference for gel migration of the corresponding cDNA bands (female-specific 2.1 Kb and 0.7 Kb; male-specific 1.1 Kb). Individual larvae were molecularly karyotyped using a Y-derived transcript from *Cclap* pseudogene (Salvemini et al., 2011). *Ccsod* transcripts were used as a positive control and as negative control for genomic DNA contamination. **b**, RT-PCR analyses of *Cctra* carried out in 6 out of 7 adult intersex XY flies showed either female-specific transcripts (1-4) or a mix of male-specific and female specific ones (5-6). Molecular karyotyping of XX/XY individuals by RT-PCR on Y-specific transcribed sequences (transcribed repetitive Y-linked sequence pY114-related by YF/YR primers; lanes 1-4; Anleitner and Haymer, 1992) and Y-linked *Cclap* (lanes 5-6) confirmed the expected XY karyotype of the intersexes, indicating partial feminization. Sex-specific *Cctra* and Y-specific *Cclap* transcripts were amplified from adult flies as a reference for gel migration of the corresponding cDNA bands.

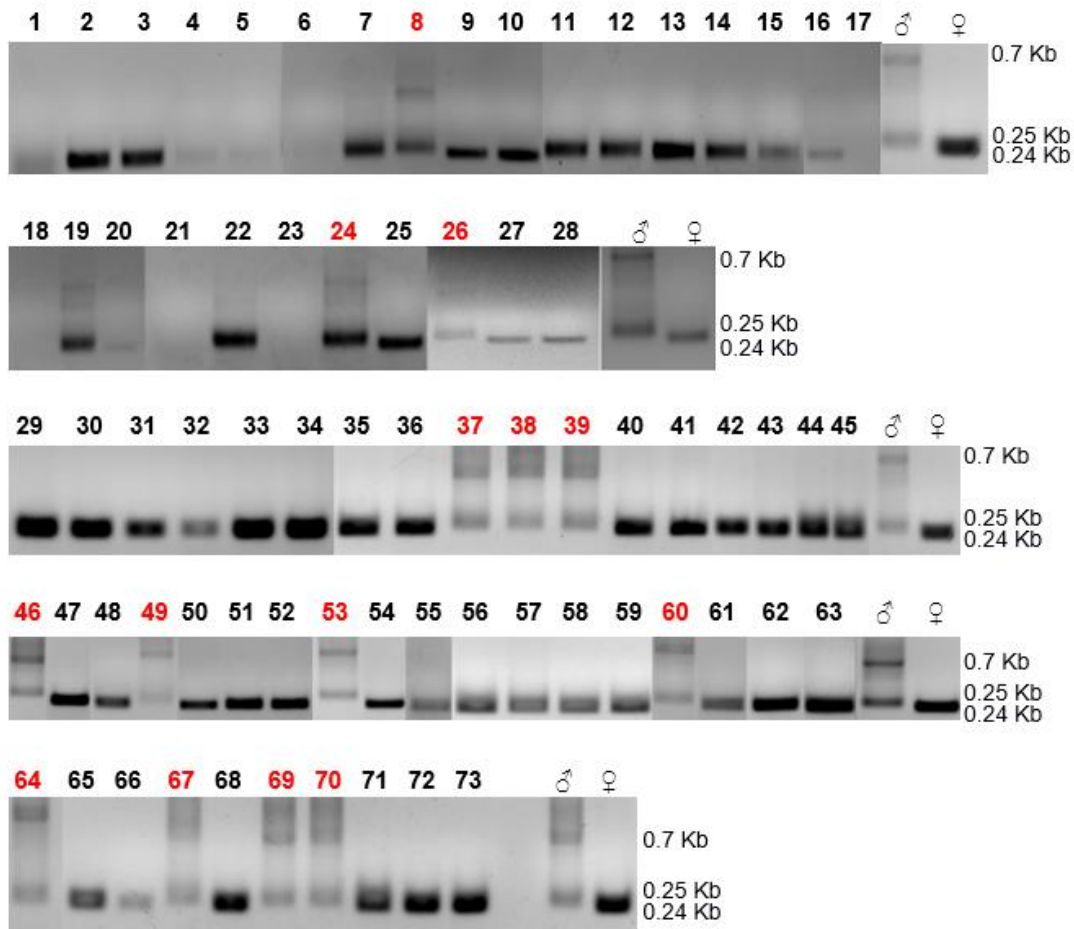

**Extended Data Fig. 2 | Molecular karyotyping of 73 G0 females obtained from embryonic *MoY* RNAi.** Sexing by PCR karyotyping was performed on genomic DNA from a small wing fragment dissected from each of 73 females from injection set #1 (Table 1). The presence of the Y chromosome (as 0.7 Kb and 0.250 Kb bands) was detected in 14 out of 73 adult females (in red) using *CcYF/CcYR* primers<sup>31</sup>. In the remaining 59 adult females, a slightly smaller band was detected indicating the absence of the Y (0.24 Kb)<sup>31</sup>.

**a**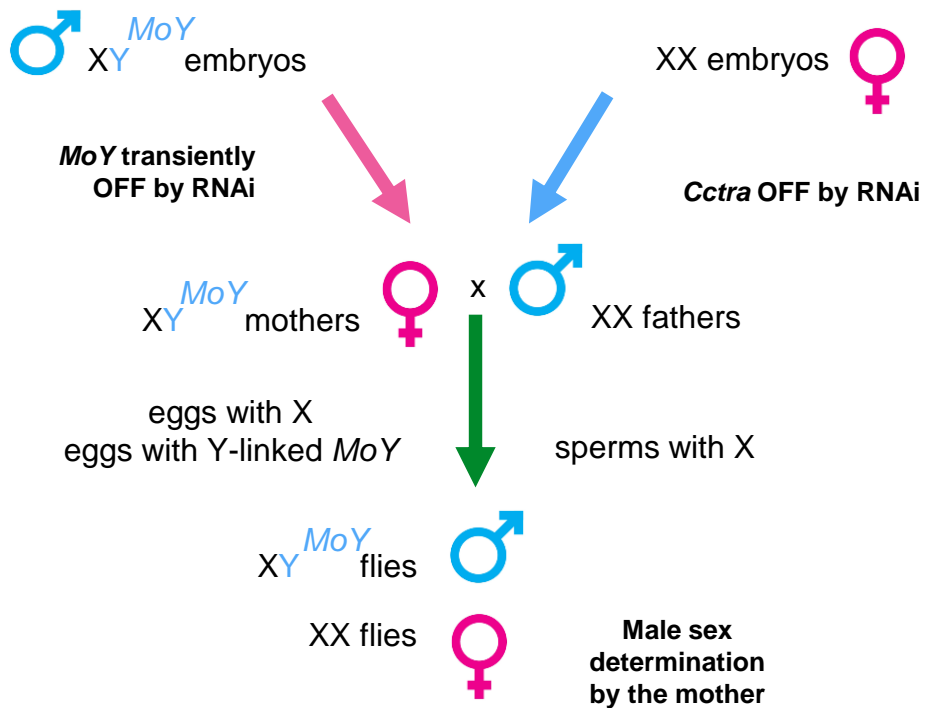**b**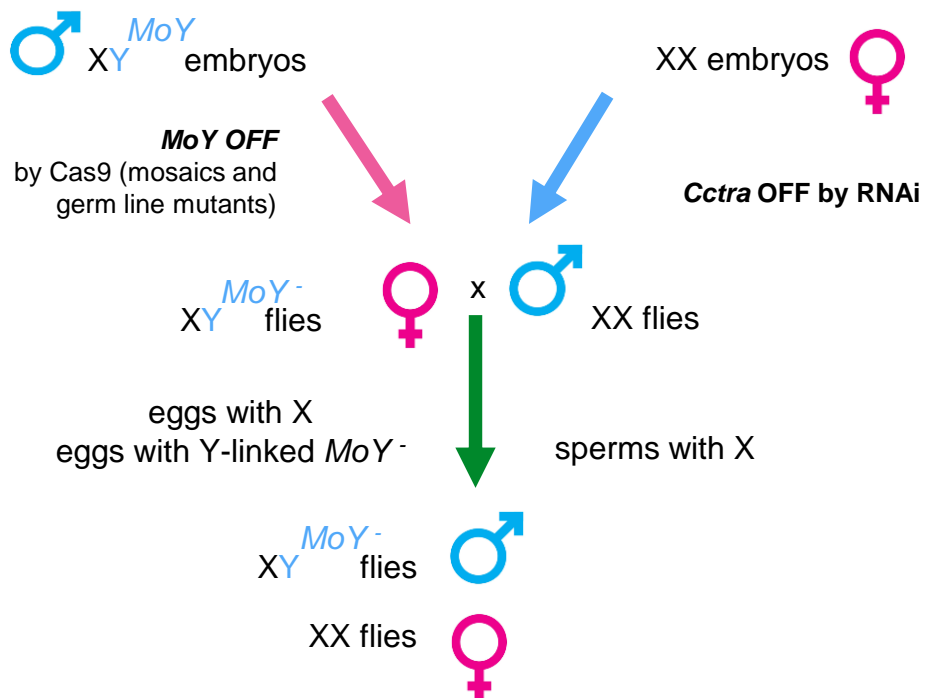

**Extended Data Fig. 3 | In *Ceratitis capitata*, artificial transient female heterogamety (XY) and male homogamety (XX) are compatible with fertility and male sex determination.** **a**, XY mothers were obtained by transient *MoY* embryonic RNAi. XX fathers were obtained by transient *Cctra* RNAi (see Methods). *MoY* gene can be transmitted by the mother and determines the male sex in the progeny. **b**, Maternal transmission of a Y chromosome carrying a *MoY* Cas9-induced null allele.

**a**

CGATGTGTTATCACAGCCACGTTCAAGACATTAAACGCATTGCTCATTAAAAACTTTATCTTGTTCGAGTACTGCTGATCAGTATT  
 ACTATCCTGTGATTTAAGCGTTTATTAAATAAAATTTGACATTTTATGGATATTGGAAATATTTTCATCGAAAAACACAATCAGTTT  
 AATAACAATAAAATATAACTCCAGAACTATCAAAGTAATTACTTCTAAAAGTCGTGGAAATGGAACCGAAATTTGGGGCAAAATGGA  
 AATTGCAATGACAGAAAATTATTCGTAGAAGAAAAACCTCTTGTATACAATTTCCGCAATGGAATATCGGAAATTAATGTCAATAGT  
 GCAAGTCTTTTCAACCAACATTCTTTCAAATATATCTGCCACATAATAACTCCGAAGGCATACTGATACATTACAAAACAGAGTCA  
 GAATATGATGAAACTTTGGCTACATAACGGACAC

CcMoY-F primer | CcMoY-R primer | ORF | sgRNA | PAM

**b**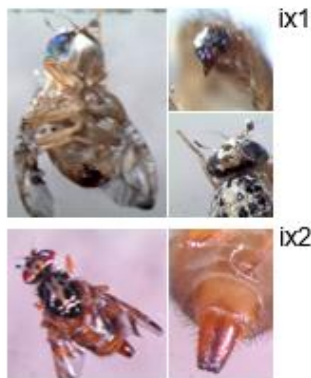**c**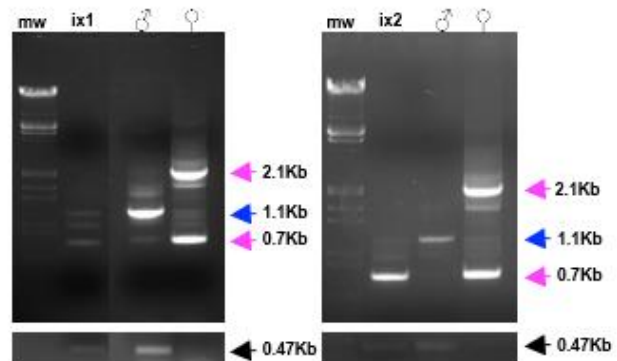**d**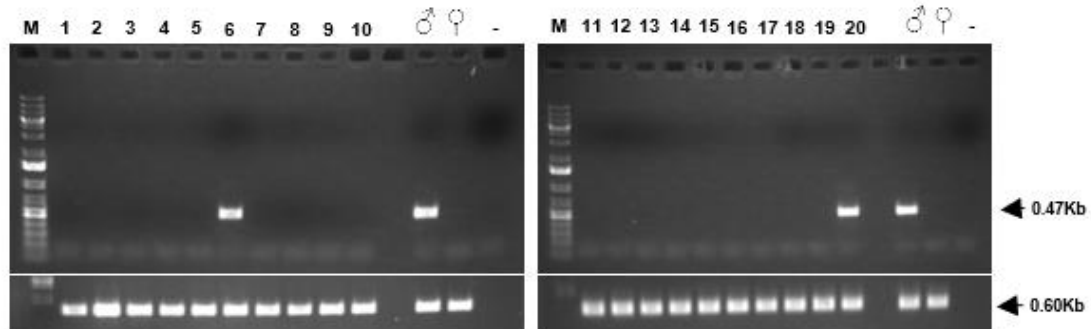**e**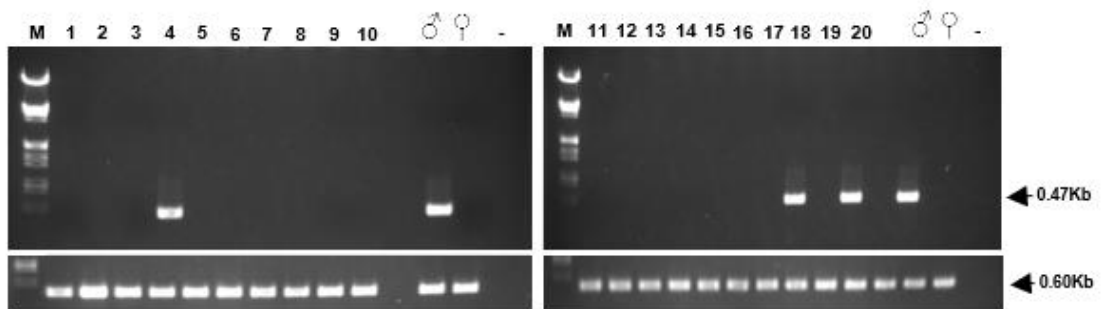

**Extended Data Figure 4 | CRISPR-induced partial feminization of XY individuals.** **a**, *MoY* coding region sequence, Cas9 target site, and primers used for PCR. ATG and STOP codon are underlined. **b**, 2 adult intersexes developed after embryonic CRISPR-Cas9 injections: ix1 shows male-head and malformed ovipositor; ix2 shows male-head and female ovipositor. **c**, RT-PCR of *Cctra* and of *MoY* (0.47 Kb) for karyotyping: both intersexes shown in figure b are XY and express a mix of male and female *Cctra* transcripts. **d**, Molecular karyotype analysis on the 20  $G_0$  female flies developed from Cas9-gRNA embryonic injections. The sexing by PCR karyotyping was performed on genomic DNA from adult females injected with the ribonucleoprotein Cas9/*MoY*-gRNA complex, using primers CcMoY-F and CcMoY-R. Two females (numbers 6 and 20) were found to be positive for *MoY*, showing a complete feminization due to the injection of the ribonucleoprotein Cas9/*MoY*-gRNA complex, causing a knock-out of the *MoY* gene. **e**, Molecular karyotype analysis on 21  $G_1$  female flies born from female 6 from Cas9-*MoY* injected embryos (Table 1 - Figure 3). Sexing by PCR karyotyping was performed on genomic DNA from the 21 females born from female 6 (see Table 1), using primers CcMoY-F and CcMoY-R. Three females (numbers 4, 18 and 20) were found to be positive to *MoY*, thus inherited the knock-out *MoY* gene from the mother. *CcSOD* PCR on genomic DNA, used as positive control, shows that the genomic DNA of all samples was amplifiable in both d and e panels.



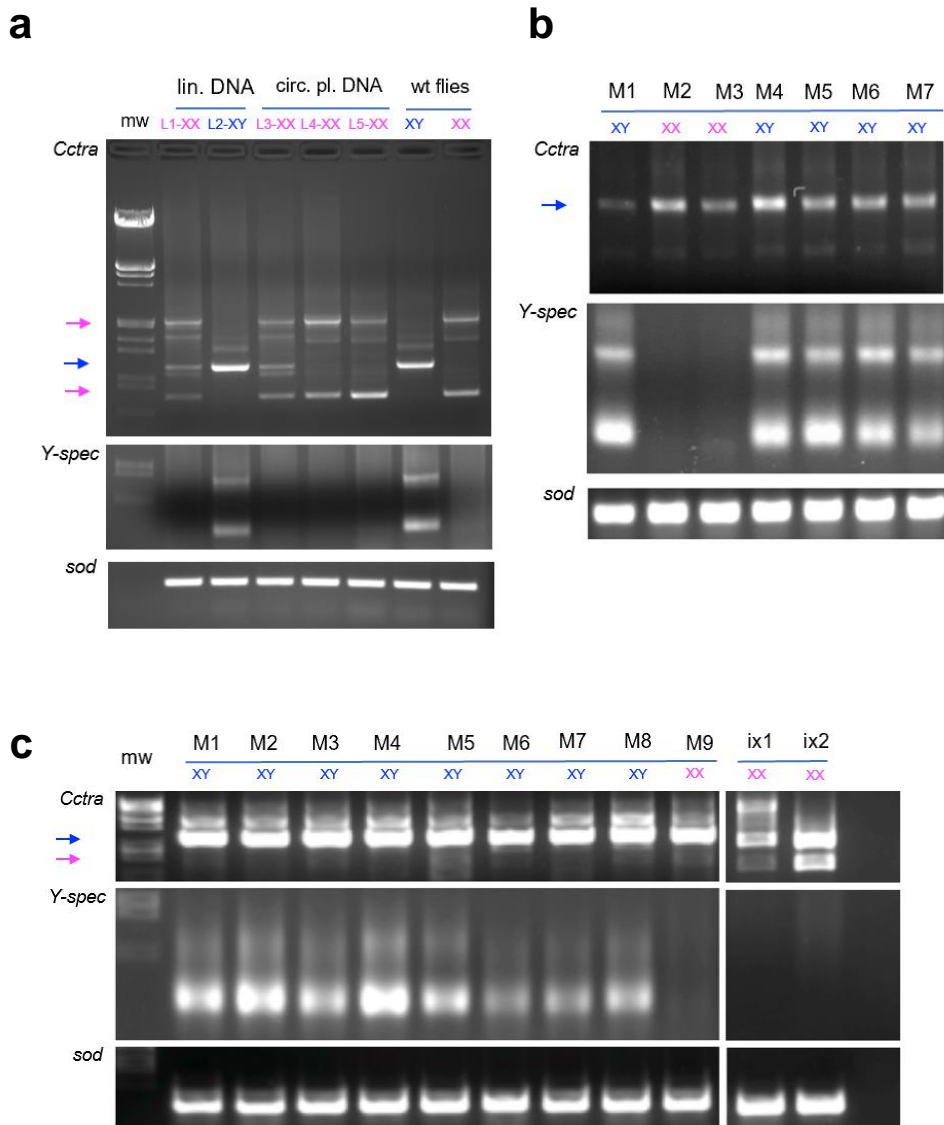

**Extended Data Fig. 6 | Molecular masculinization of XX larvae following embryos injection with *MoY* genomic DNA. a, b, c, RT-PCR of *Cctra*, the Y-linked *Cclap* (b) and *Ccsod* as positive control (c) on individuals from injected embryos (Extended Data Table 3, injection set 3# and 4#)(mw: molecular marker). a, L1 and L3 larvae, respectively from injected embryos with linear (Lin.) or plasmidic (circ. = circular) *MoY* DNA showed XX karyotype (lack of Y-specific *Cclap* cDNA bands) and a male-specific *Cctra* band (blue arrow; 1.1 Kb), in addition to the female specific ones (pink arrows, 2 Kb and 0.7 Kb). No effect is observed in XY larvae. L4 and L5 XX larvae are escapers of the masculinization induced by the *MoY* plasmid, possibly because of quantitative variability in the manual embryos injections. Some minor *Cctra* different bands visible in distinct lanes are likely due to variable amplification of intermediates of *Cctra* splicing. b, Two out of 7 adult males (Extended Data Table 3, *MoY* DNA linear fragment embryos injections set 3#), showed XX karyotype but male-specific *Cctra* splicing product (blue arrow; 1.1 Kb), indicating apparently full molecular masculinization. Molecular karyotyping (*Y-spec*) and positive control (*sod*) are also shown. Similar molecular analysis and karyotyping were performed on the remaining 12 males from the same injection set 3# (data not shown). c, One of 9 adult males from *MoY* DNA plasmid embryos injection set 4# (Extended Data Table 3) showed XX karyotype and male-specific *Cctra* splicing, suggesting again full molecular masculinization. Two phenotypic XX intersexes showed a mix of male- and female-specific *Cctra* products.**



**a**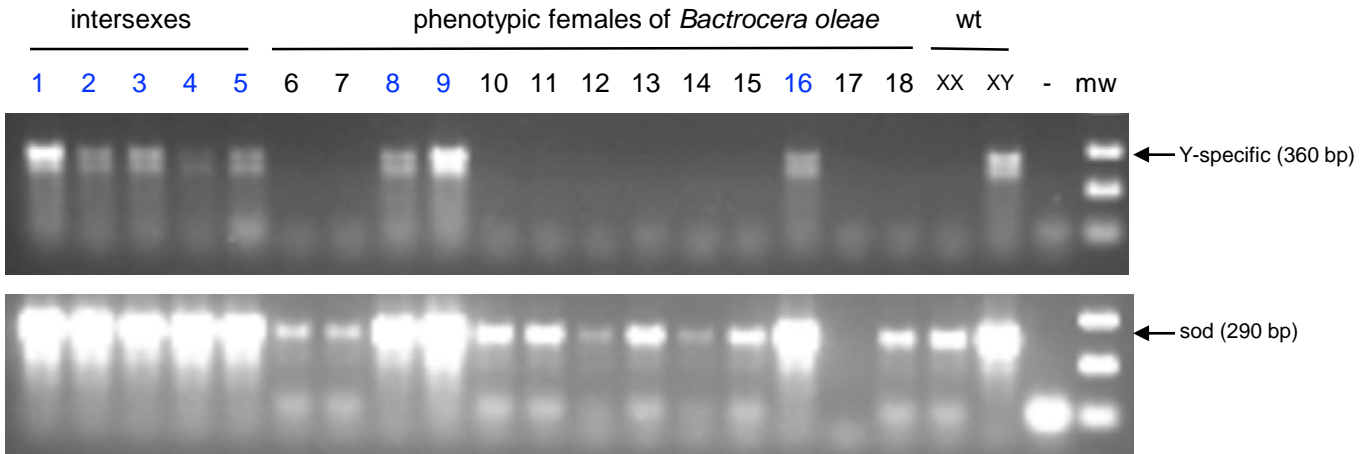**b**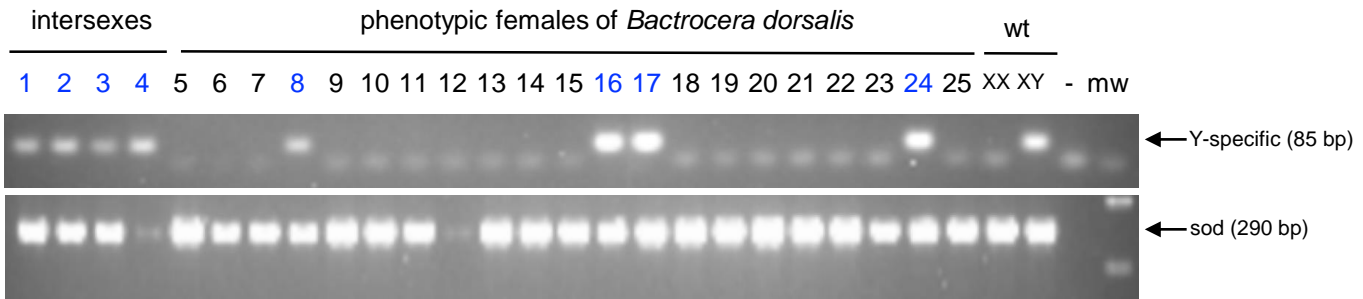

**Extended Data Figure 7 | Molecular karyotyping of intersexes and G0 females from *MoY* embryonic RNAi in *B. oleae* (a) and *B. dorsalis* (b).** Adult flies from injections sets 7# and 8# were molecularly karyotyped by PCR with Y-specific primers (see mat. and meth.). **a**, 5 *B. oleae* intersexes and 3 females were found to be XY. XX and XY are positive controls (the female and male Bo adults, respectively). **b**, 4 *B. dorsalis* intersexes and 4 females were found to be XY. XX and XY are positive controls (the female and male Bd adults, respectively).
